# Supplementary material for: Impact of Drying Processes on the Nutritional Composition, Volatile Profile, Phytochemical Content and Bioactivity of Salicornia ramosissima J. Woods
Source: MDPI journal article supplement (doi:10.3390/antiox10081312), 2021-08-20
Supplement: s1 [file s1]

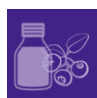**Table S1.** Characteristics of participants of the Acceptability testing of ketchups with oven dried *S. ramosissima*.

| Sensory Test (n = 102)                               | n  | %   |
|------------------------------------------------------|----|-----|
| <i>Gender</i>                                        |    |     |
| Male                                                 | 32 | 31% |
| Female                                               | 70 | 69% |
| <i>Ages</i>                                          |    |     |
| [18-20]                                              | 2  | 2   |
| [21-30]                                              | 51 | 50  |
| [31-40]                                              | 26 | 25  |
| [41-50]                                              | 12 | 12  |
| [51-60]                                              | 11 | 11  |
| <i>Nationality</i>                                   |    |     |
| Portugal                                             | 95 | 93  |
| Other                                                | 7  | 7   |
| <i>Education</i>                                     |    |     |
| High-school or less                                  | 12 | 12  |
| Bachelor's degree                                    | 21 | 21  |
| Master's degree                                      | 39 | 38  |
| Doctor's degree                                      | 30 | 29  |
| <i>Ketchup consumption frequency</i>                 |    |     |
| Daily                                                | 0  | 0   |
| Twice a week                                         | 3  | 3   |
| Once a week                                          | 24 | 24  |
| Once a month                                         | 35 | 34  |
| Rarely                                               | 39 | 38  |
| Never                                                | 1  | 1   |
| <i>Typical foods eaten with ketchup <sup>a</sup></i> |    |     |
| French fries                                         | 92 | 35  |
| Pork or other meat sandwiches                        | 39 | 15  |
| Other sandwiches                                     | 6  | 2   |
| Pizza                                                | 13 | 5   |
| Salad                                                | 2  | 1   |
| Pasta                                                | 15 | 6   |
| Hamburgers                                           | 80 | 31  |
| Other                                                | 12 | 5   |

<sup>a</sup> The participant was allowed to select more than one option in this question, so the percentages were adjusted to the total number of responses.

**Table S2.** Nutritional parameters, and mineral and fatty acids composition of the ketchups with 2.2% dried *S. ramosissima* (DS) and 3.0% dried *S. ramosissima* used in sensorial analysis (Acceptability testing).

| Ketchup sample designation                       | 2.2% DS                    | 3.0% DS                    |
|--------------------------------------------------|----------------------------|----------------------------|
| <i>Nutritional composition (g/100g)</i>          |                            |                            |
| Moisture                                         | 71.30 ± 0.71 <sup>a</sup>  | 68.40 ± 0.68 <sup>b</sup>  |
| Ashes                                            | 1.86 ± 0.07 <sup>b</sup>   | 2.34 ± 0.09 <sup>a</sup>   |
| Protein                                          | 1.68 ± 0.07 <sup>b</sup>   | 2.00 ± 0.08 <sup>a</sup>   |
| Total fat                                        | 0.20 ± 0.01 <sup>a</sup>   | 0.20 ± 0.01 <sup>a</sup>   |
| Carbohydrates                                    | 22.80 ± 0.91 <sup>a</sup>  | 24.40 ± 0.98 <sup>a</sup>  |
| Total sugar                                      | 21.60 ± 3.24 <sup>a</sup>  | 21.20 ± 3.18 <sup>a</sup>  |
| Total dietary fiber                              | 2.20 ± 0.07 <sup>b</sup>   | 2.70 ± 0.08 <sup>a</sup>   |
| Energy value (kcal/100g)                         | 104.10 ± 4.16 <sup>a</sup> | 112.80 ± 4.51 <sup>a</sup> |
| Chlorides                                        | 1.08 ± 0.10 <sup>b</sup>   | 1.36 ± 0.15 <sup>a</sup>   |
| Salt                                             | 0.91 ± 0.12 <sup>b</sup>   | 1.38 ± 0.18 <sup>a</sup>   |
| <i>Fatty acids profile (g/100g) <sup>c</sup></i> |                            |                            |
| Myristic acid (C14:0)                            | 2,62 ± 0.01 <sup>a</sup>   | 2,45 ± 0.01 <sup>b</sup>   |
| Palmitic acid (C16:0)                            | 24,0 ± 0.01 <sup>a</sup>   | 24,0 ± 0.01 <sup>a</sup>   |
| Stearic acid (C18:0)                             | 3,83 ± 0.01 <sup>a</sup>   | 3,73 ± 0.01 <sup>b</sup>   |
| Oleic acid (C18:1)                               | 5,70 ± 0.01 <sup>a</sup>   | 5,65 ± 0.01 <sup>a</sup>   |
| Linoleic acid (C18:2)                            | 40,9 ± 0.01 <sup>a</sup>   | 40,5 ± 0.01 <sup>a</sup>   |
| Linolenic acid (C18:3)                           | 19,2 ± 0.01 <sup>b</sup>   | 20,2 ± 0.01 <sup>a</sup>   |
| Arachidic acid (C20:0)                           | 0,84 ± 0.01 <sup>a</sup>   | 0,86 ± 0.01 <sup>a</sup>   |
| Arachidonic acid (C20:4)                         | 0,38 ± 0.01 <sup>a</sup>   | 0,24 ± 0.01 <sup>b</sup>   |
| Behenic acid (C22:0)                             | 0,74 ± 0.01 <sup>b</sup>   | 0,82 ± 0.01 <sup>a</sup>   |
| Lignoceric acid (C24:0)                          | 0,76 ± 0.01 <sup>b</sup>   | 0,87 ± 0.01 <sup>a</sup>   |
| SFA                                              | 33,5 ± 0.01 <sup>a</sup>   | 33,0 ± 0.01 <sup>a</sup>   |
| MUFA                                             | 6,10 ± 0.01 <sup>a</sup>   | 6,02 ± 0.01 <sup>a</sup>   |
| PUFA                                             | 60,5 ± 0.01 <sup>a</sup>   | 61,0 ± 0.01 <sup>a</sup>   |
| <i>Mineral composition (mg/100g)</i>             |                            |                            |
| Sodium (Na)                                      | 364 ± 47.3 <sup>b</sup>    | 550 ± 71.5 <sup>a</sup>    |
| Calcium (Ca)                                     | 21.40 ± 2.57 <sup>a</sup>  | 27.30 ± 3.28 <sup>a</sup>  |
| Potassium (K)                                    | 330 ± 69.3 <sup>a</sup>    | 370 ± 77.7 <sup>a</sup>    |
| Iron (Fe)                                        | 1.47 ± 0.21 <sup>a</sup>   | 1.34 ± 0.19 <sup>a</sup>   |
| Magnesium (Mg)                                   | 39.90 ± 5.59 <sup>a</sup>  | 50.40 ± 7.06 <sup>a</sup>  |
| Manganese (Mn)                                   | 0.28 ± 0.04 <sup>a</sup>   | 0.35 ± 0.05 <sup>a</sup>   |
| Zinc (Zn)                                        | 0.22 ± 0.03 <sup>a</sup>   | 0.28 ± 0.04 <sup>a</sup>   |
| Copper (Cu)                                      | <0.05 <sup>*</sup>         | 0.10 ± 0.01 <sup>a</sup>   |

<sup>\*</sup>(LOQ = 0.05 g/100g), SFA - total saturated fatty acids, MUFA - total monounsaturated fatty acids, PUFA - total polyunsaturated fatty acids. <sup>a</sup>Data are expressed as means values ± standard deviation (n = 3). <sup>b</sup> The letters correspond to the statistical analysis performed to calculate the existence of a significant difference (p < 0.05), between both drying methods, by unpaired t test. <sup>c</sup> Data are expressed in percentages of total methyl esters ± standard deviation (n=3).
